# Supplementary material for: Ranking of Empirical Evapotranspiration Models in Different Climate Zones of Pakistan
Source: MDPI journal article supplement (doi:10.3390/land11122168), 2022-11-30
Supplement: s1 [file s1]

# Ranking of Empirical Evapotranspiration Models in Different Climate Zones of Pakistan

Mohammed Magdy Hamed<sup>1,2,\*</sup> Najeebullah Khan<sup>3</sup>, Mohd Khairul Idlan Muhammad<sup>2</sup> and Shamsuddin Shahid<sup>2,\*</sup>

**Table S1.** List of the empirical ET equations and applications.

| (a)<br>o | Model (Year)               | Equation                                                                                                                                                                     | Application                                                            |
|----------|----------------------------|------------------------------------------------------------------------------------------------------------------------------------------------------------------------------|------------------------------------------------------------------------|
| (b)      | Dalton (1802)              | $ET = (0.3648 + 0.07223(u))(e_s - e_a)$                                                                                                                                      | Bormann (2011), Tabari et al (2013), Valipour (2014), Rezaei (2016)    |
| 2        | Trabert (1896)             | $ET = (0.3075)\sqrt{u}(e_s - e_a)$                                                                                                                                           | Bormann (2011), Tabari et al (2013), Valipour (2014), Rezaei (2016)    |
| 3        | Meyer (1926)               | $ET = (0.375 + 0.05026(u))(e_s - e_a)$                                                                                                                                       | Bormann (2011), Tabari et al (2013), Valipour (2014), Rezaei (2016)    |
| 4        | Rohwer (1931)              | $ET = (3.3 + 0.891(u))(e_s - e_a)$                                                                                                                                           | Valipour (2014), Rezaei (2016)                                         |
| 5        | Penman (1948)              | $ET = (2.625 + 0.000479/u)(e_s - e_a)$                                                                                                                                       | Valipour (2014), Rezaei (2016)                                         |
| 6        | Albrecht (1950)            | $ET = (0.1005 + 0.297(u))(e_s - e_a)$                                                                                                                                        | Bormann (2011), Tabari et al (2013), Valipour (2014), Rezaei (2016)    |
| 7        | Makkink (1957)             | $ET = 0.61 \left( \frac{\Delta}{\Delta + \gamma} \right) \frac{R_s}{58.5} - 0.12$                                                                                            | Lu et al (2005), Niaghi et al (2013), Rahimikhoob et al (2012)         |
| 8        | Ivanov (1961)              | $ET = 0.00006(25 + T_{mean})^2(100 - RH)$                                                                                                                                    | Valipour (2014), Rezaei (2016)                                         |
| 9        | Turc (1961)                | $ET = 0.013 \left( \frac{T_{mean}}{T_{mean} + 15} \right) (R_s + 50)$                                                                                                        | Heydari et al (2013), Lu et al (2005), Xystrakis and Matzarakis (2010) |
| 10       | Hamon (1963)               | $ET = 0.1651 L_d RHOSAT \times KPEC$<br>$RHOSAT = \frac{216.7 ESAT}{T_{mean} + 273.3}$<br>$ESAT = 6.108 \exp \left( \frac{17.269 \times T_{mean}}{T_{mean} + 273.3} \right)$ | Lu et al (2005)                                                        |
| 11       | Jensen Haise (1963)        | $ET = \left( \frac{R_s}{\lambda} \right) (0.025 T_{mean} + 0.08)$                                                                                                            | Xystrakis and Matzarakis (2010); Heydari et al (2014)                  |
| 12       | Brockamp & Wenner (1963)   | $ET = 0.543(u^{0.456})(e_s - e_a)$                                                                                                                                           | Bormann (2011), Tabari et al (2013), Valipour (2014), Rezaei (2016)    |
| 13       | Papadakis (1966)           | $ET = 2.5(e_{ma} - e_a)$                                                                                                                                                     | Valipour (2014), Rezaei (2016)                                         |
| 14       | WMO (1966)                 | $ET = (0.1298 + 0.0934(u))(e_s - e_a)$                                                                                                                                       | Bormann (2011), Tabari et al (2013), Valipour (2014), Rezaei (2016)    |
| 15       | Schendel (1967)            | $ET = 16 \left( \frac{T_{mean}}{RH} \right)$                                                                                                                                 | Bormann (2011), Djaman (2015)                                          |
| 16       | Mahringer (1970)           | $ET = (0.15072)\sqrt{3.6u}(e_s - e_a)$                                                                                                                                       | Bormann (2011), Tabari et al (2013), Valipour (2014), Rezaei (2016)    |
| 17       | Priestley Taylor (1972)    | $ET = \alpha \left( \frac{\Delta}{\Delta + \gamma} \right) \frac{R_n}{\lambda}$                                                                                              | Bormann (2011), Niaghi et al (2013), Rahimikhoob et al (2012)          |
| 18       | McGuinness & Bordne (1972) | $ET = (0.0082 T_{mean} - 0.19) \frac{R_s}{1500} (2.54)$                                                                                                                      | Tabari et al (2013), Heydari et al (2014)                              |
| 19       | Szasz (1973)               | $ET = 0.00536(T_{mean} + 21)^2 \left( 1 - \frac{RH}{100} \right)^{2/3} f(u)$<br>$f(u) = (0.0519u) + 0.905$                                                                   | Rácz et al (2013)                                                      |
| 20       | Caprio (1974)              | $ET = \left( \frac{6.1}{10^6} \right) R_s (1.8 T_{mean} + 1.0)$                                                                                                              | Oudin et al (2005)                                                     |

|    |                          |                                                                                                           |                                                                                                                                                |
|----|--------------------------|-----------------------------------------------------------------------------------------------------------|------------------------------------------------------------------------------------------------------------------------------------------------|
| 21 | Blaney Criddle (1977)    | $ET = k \times p(0.46T_{mean} + 8.13)$                                                                    | Niaghi et al (2013, Heydari et al (2014), Josilva et al (2016), Poyen et al (2018)                                                             |
| 22 | Linacre (1977)           | $ET = \frac{\frac{700(T_{mean} \pm 0.006z)}{100 - L} + 15(T_{mean} - T_d)}{80 - T_{mean}}$                | Josilva (2016)                                                                                                                                 |
| 23 | Kharuffa (1985)          | $ET = 0.34pT_{mean}^{1.30}$                                                                               | Heydari et al (2014)                                                                                                                           |
| 24 | Hargreaves Samani (1985) | $ET = \left(0.0023 \frac{R_a}{2.45}\right) TD^{0.5} (T_{mean} + 17.8)$                                    | Heydari et al (2013), Oudin et al (2005), Rahimikhoob et al (2012), Xu and Singh (2002), Xystrakis and Matzarakis (2010), Josilva et al (2016) |
| 25 | Ritchie (1990)           | $ET = \alpha_1(3.87 \times 10^{-3})(R_s(0.6T_{max} + 0.4T_{min} + 29))$                                   | Tabari et al (2013)                                                                                                                            |
| 26 | Abtew (1996)             | $ET = 0.53 \left(\frac{R_s}{\lambda}\right)$                                                              | Abtew, 1996                                                                                                                                    |
| 27 | FAO56 PM (1998a)         | $ET = \frac{0.408(R_n - G) + \gamma \frac{900}{T_{mean} + 273} u(e_s - e_a)}{\Delta + \gamma(1 + 0.34u)}$ | Heydari et al (2013), Niaghi et al (2013), Rahimikhoob et al (2012), Tabari et al (2013), Valipour (2014), Rezaei (2016)                       |
| 28 | Irmak-Rs (2003)          | $ET = -0.611 + 0.149R_s + 0.079T_{mean}$                                                                  | Heydari et al (2013), Niaghi et al (2013), Tabari et al (2013), Heydari et al (2014)                                                           |
| 29 | Irmak-Rn (2003)          | $ET = 0.489 + 0.289R_n + 0.023T_{mean}$                                                                   | Heydari et al (2013), Niaghi et al (2013), Tabari et al (2013), Heydari et al (2014)                                                           |
| 30 | Trajkovic (2007)         | $ET = (0.0023R_a)TD^{0.424}(T_{mean} + 17.8)$                                                             | Djaman (2015)                                                                                                                                  |
| 31 | Ravazzani (2012)         | $ET = (0.817 + 0.00022z)(0.0023R_a)(TD^{0.5})(T_{mean} + 17.8)$                                           | Djaman (2015)                                                                                                                                  |

ET is the potential evapotranspiration (mm day<sup>-1</sup>). ET is in mm day<sup>-1</sup> in all equations except Ritchie and McGuinness & Bordne models, ET is in cm day<sup>-1</sup>. R<sub>n</sub> is the net radiation (MJ m<sup>-2</sup> day<sup>-1</sup>). G is the soil heat flux (MJ m<sup>-2</sup> day<sup>-1</sup>). R<sub>a</sub> is the extraterrestrial radiation (MJ m<sup>-2</sup> day<sup>-1</sup>). γ is the psychrometric constant (kPa/°C). e<sub>s</sub> is the saturation vapour pressure (hPa). e<sub>a</sub> is the actual vapour pressure (hPa). e<sub>s</sub> and e<sub>a</sub> are in hPa in all equations except Papadakis, Rohwer, Penman and FAO56 Penman-Monteith models, e<sub>s</sub> and e<sub>a</sub> are in kPa. Δ is the slope of the saturation vapour pressure–temperature curve (kPa/°C). λ is latent heat of evaporation (MJ/kg). T<sub>mean</sub> is the average daily air temperature (°C). T<sub>mean</sub> is in °C in all equations except McGuinness & Bordne model, T<sub>mean</sub> is in degree Fahrenheit. U is the mean daily wind speed at 2 m (m s<sup>-1</sup>). f(u) is function of wind speed. Z is the elevation (m). L is local latitude (degrees). T<sub>d</sub> is dew point temperature (°C). T<sub>min</sub> is the minimum air temperature (°C). T<sub>max</sub> is the maximum air temperature (°C). TD is maximum and minimum temperature difference (°C). RH is the average relative humidity (%). R<sub>s</sub> is the solar radiation. R<sub>s</sub> is in MJ m<sup>-2</sup> day<sup>-1</sup> in all equations except Turc, Makkink, Ritchie and McGuinness & Bordne models, R<sub>s</sub> is in Cal/m<sup>2</sup> day and Caprio model, R<sub>s</sub> is in kJ/m<sup>2</sup> day. e<sub>ma</sub> is the saturation vapour pressure at the monthly mean daily maximum temperature (kPa). k is monthly consumptive use coefficient which depends on location, season and vegetation type. The average value of k is 0.8 which also requires local calibration (Poyen et al, 2018). p is the mean annual percentage of daytime hours for different latitudes that can be obtained from Doorenbos and Pruitt (1977). p is expressed as constant (0.274) in Josilva et al (2016). L<sub>d</sub> is daytime length in multiples of 12 h. RHOSAT is saturated vapor density (g m<sup>-3</sup>). ESAT is saturated vapor pressure (mbar). KPEC is calibration coefficient (1.2). α is constant (1.26). α<sub>1</sub> is constant (1.1).
